# Supplementary material
Source: PubMed Central journal article supplement (PMC3911376)
Supplement: IAI.01291-13_zii999090504so1.pdf [file IAI.01291-13_zii999090504so1.pdf]

## Supplementary Data

**Figure S1. Characterization of HEK293 reporter cell lines.** HEK293 luciferase reporter cell lines were left unstimulated or stimulated with 100 U/ml IFN- $\gamma$ , 100 U/ml IFN- $\beta$ , 20 ng/ml TNF- $\alpha$ , or 50 ng/ml IL-4. Cells were lysed 6-20 hours later and luciferase activity was measured and normalized to levels in unstimulated cells. **A.** HEK293 ISRE reporter cell line. Data and standard deviation from one experiment are shown. Unstimulated, IFN- $\gamma$ , and IFN- $\beta$  conditions have been repeated four times with similar results. **B.** HEK293 STAT1 reporter cell line. Average luciferase induction from three experiments is shown and error bars represent s.e.m.

**Figure S2. CHX treatment prevents the expression of IFN- $\gamma$  induced IRF1.** HFFs on coverslips were pre-treated with 50  $\mu$ g/ml CHX for one hour and 40 minutes and subsequently stimulated with 100 U/ml IFN- $\gamma$  for two and a half hours. Cells were also left untreated and/or unstimulated. Cells were fixed, permeabilized, and stained for IRF1 (red) and with Hoechst dye (nucleus, blue).

**Figure S3. CHX qPCR data normalized to NFE2L1.** RT-qPCR data from Fig. 5A,B are shown normalized to a different control gene, *NFE2L1*.

**Figure S4. Infection of cells for ChIP inhibits IRF1 expression and activates phosphorylation of STAT1.** Coverslips were placed in 15 cm dishes prior to plating of HFFs for the ChIP assay. HFFs were infected with an RH or RH  $\Delta$ *rop16* strain for five hours, or left uninfected (UI), with 100 U/ml IFN- $\gamma$  added for the last hour of infection, or cells were left

unstimulated (US). After fixation, coverslips were removed from the plates and the remaining HFFs were used for ChIP assays (Fig. 2A). Coverslips were then permeablized and stained for IRF1 and phospho-STAT1<sup>Tyr</sup>. The intensity of IRF1 (A) and phospho-STAT1<sup>Tyr</sup> (B) nuclear staining was quantified in at least 30 cells, regardless of infection status. Each dot represents one cell and black bars represent average staining. This experiment was performed for all three biological replicates of the ChIP assay with similar results, data shown are from one experiment.

**Figure S5. IFN $\beta$  qPCR data normalized to NFE2L1.** RT-qPCR data from one experiment from Fig. 3B are shown normalized to two different control genes, *ACTB* and *NFE2L1*.

**Table S1. RT-qPCR primers.** Primers were designed to amplify 100-300 bp near the 3' ends of genes, spanning intron-exon boundaries if possible. Primer pair efficiencies were calculated using Real-time PCR Miner (1).

**Table S2. STAT1 ChIP-qPCR primers.** Primers were designed to amplify 150-180 bp regions of STAT1 binding sites in the promoters of IFN- $\gamma$  induced genes as well as a negative control region where STAT1 is not known to bind. Published STAT1 ChIP-seq data was used to determine regions of STAT1 binding (2). Primer pair efficiencies were calculated using Real-time PCR Miner (1).

**Table S3. Mass spectrometry results for STAT1 IPs.** Total number of STAT1 peptides, number of unique STAT1 peptides, and percent coverage of STAT1 detected in mass

spectrometry experiments are shown for each immunoprecipitation experiment, including each sample and each fraction.

## References

1. **Zhao S, Fernald RD.** 2005. Comprehensive algorithm for quantitative real-time polymerase chain reaction. *Journal of computational biology : a journal of computational molecular cell biology* **12**:1047–64.
2. **Robertson G, Hirst M, Bainbridge M, Bilenky M, Zhao Y, Zeng T, Euskirchen G, Bernier B, Varhol R, Delaney A, Thiessen N, Griffith OL, He A, Marra M, Snyder M, Jones S.** 2007. Genome-wide profiles of STAT1 DNA association using chromatin immunoprecipitation and massively parallel sequencing. *Nature methods* **4**:651–657.

Fig. S1

A

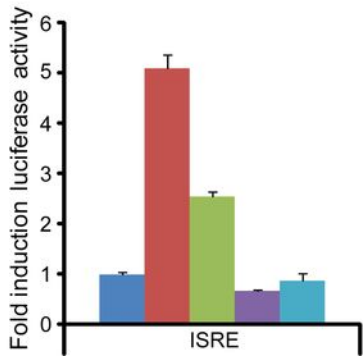

B

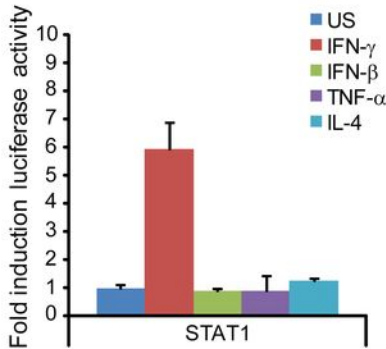

Fig. S2

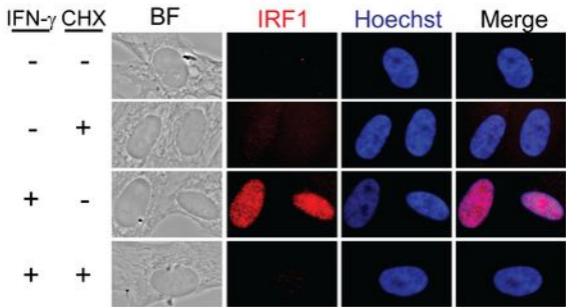

Fig. S3

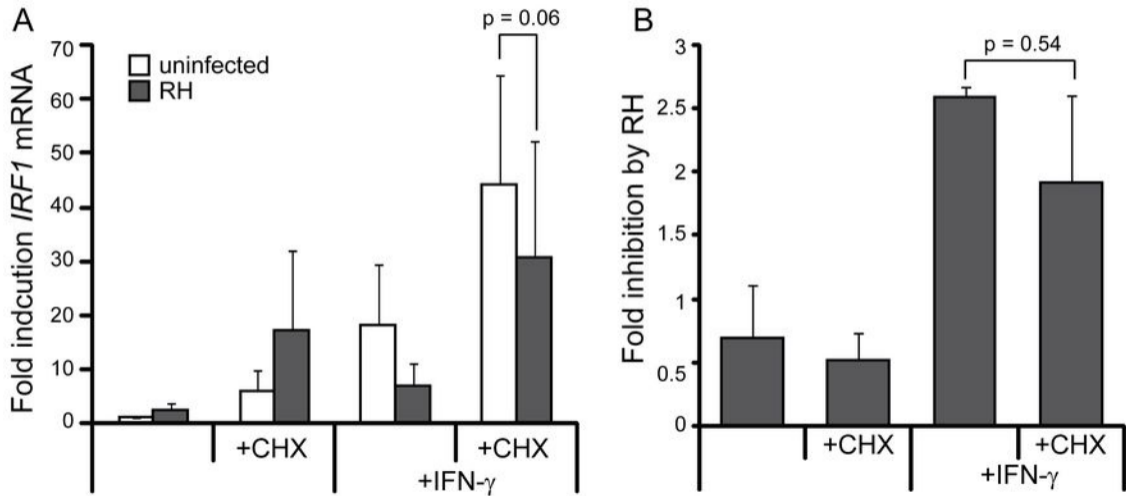

Fig. S4

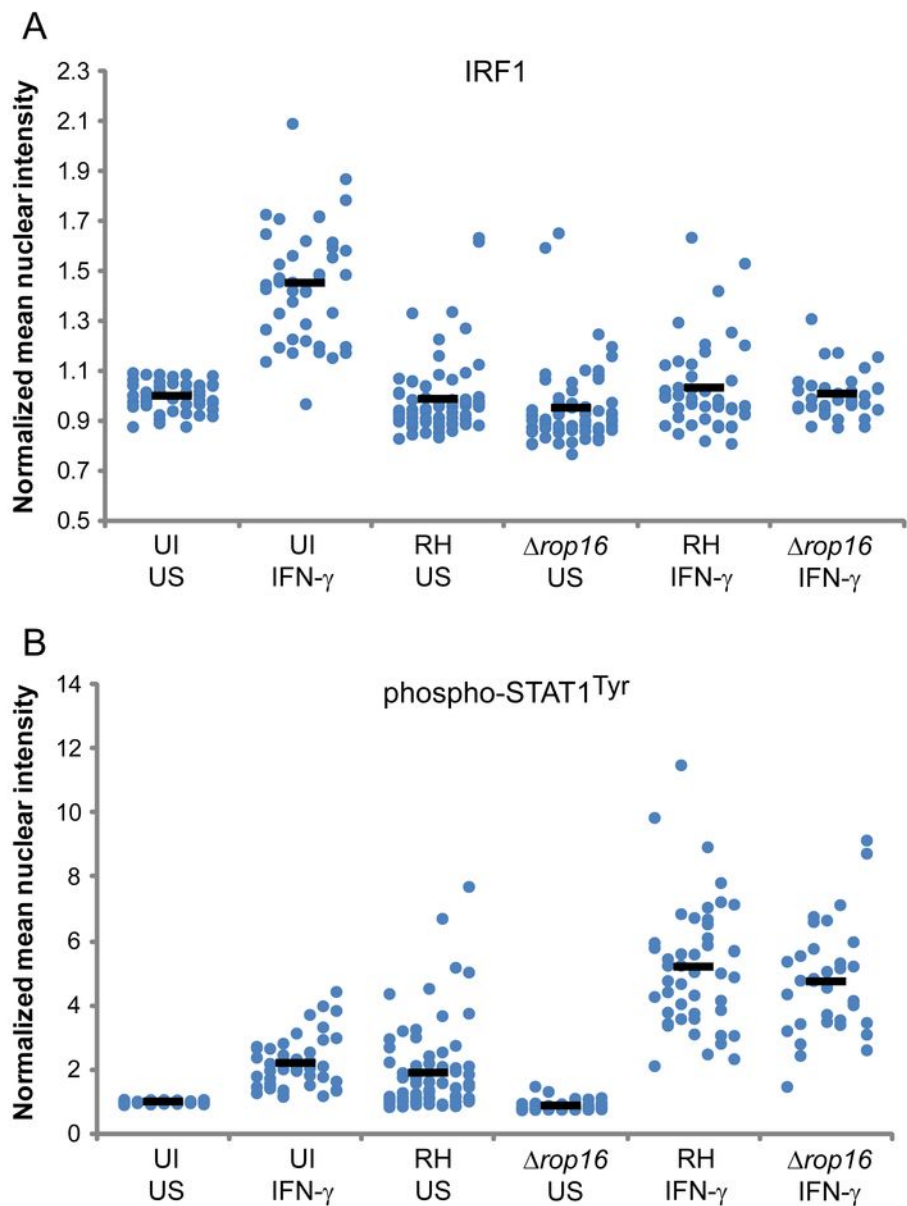

Fig. S5

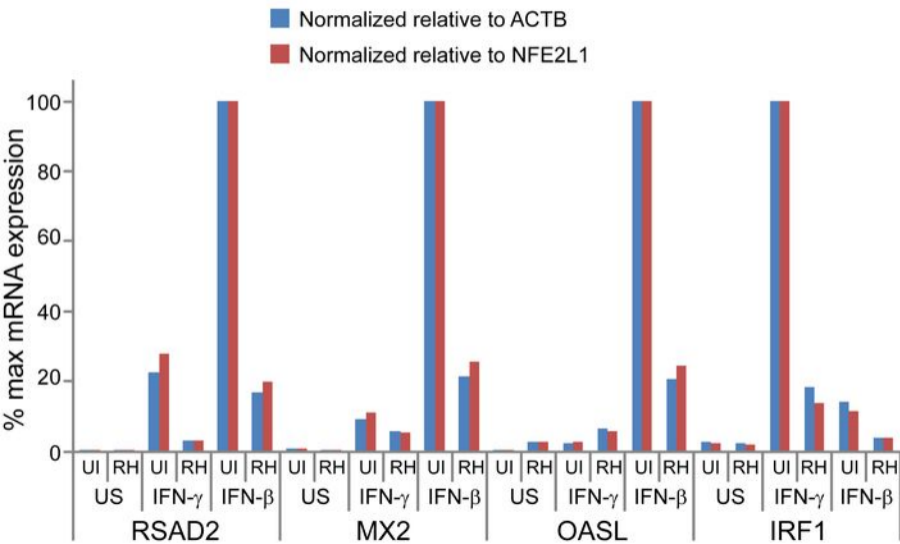



**Table S1. RT-qPCR primers**

|        | Forward primer (5' to 3') | Reverse primer (5' to 3') | Calculated Primer Pair Efficiency |
|--------|---------------------------|---------------------------|-----------------------------------|
| IRF1   | GGATTCCAGCCCTGATACCT      | CCTGCTCCACCTCCAAGTC       | 100.50%                           |
| RSAD2  | GAGCGCCACAAAGAAGTGTC      | TCCTTCCGTCCTTTCTACA       | 104.44%                           |
| MX2    | GCATCCACCTGAATGCCTAC      | GCTTTCTGCAAGGAGTCACC      | 93.34%                            |
| OASL   | AGGGTACAGATGGGACATCG      | AAGGGTTCACGATGAGGTTG      | 98.25%                            |
| ACTB   | CATGTACGTTGCTATCCAGGC     | CTCCTTAATGTCACGCACGAT     | 95.41%                            |
| NFE2L1 | AGCAGCTCTGAAGGCAGTTC      | AGCTGGATCCTGGTAGCTCA      | 99.22%                            |

**Table S2. ChIP-qPCR primers**

|        | Forward primer (5' to 3') | Reverse primer (5' to 3') | Calculated Primer Pair Efficiency |
|--------|---------------------------|---------------------------|-----------------------------------|
| IRF1   | TTGCCTCGACTAAGGAGTGG      | TTCGCCGCTAGCTCTACAAC      | 89.50%                            |
| SOCS3  | GGAGCAGGGAGTCCAAGTC       | GCGCTCAGCCTTTCTCTG        | 105.46%                           |
| GBP1   | TGGACAAATTCGTAGAAAGACTCA  | GCACAAAACTGTCCCAAC        | 95.73%                            |
| CIITA  | ACATTTTTGCCCATGAGGTC      | CTCACATCCTAAGGGCCAGA      | 105.44%                           |
| CXCL10 | AAAGGAACAGTCTGCCCTGA      | GCCCTGCTCTCCACTTTT        | 106.46%                           |
| IDO1   | CACAGTCATTGTATTCTTTTGCTG  | GCATATGGCTTTCGTTACAGTC    | 107.48%                           |
| ICAM1  | CCCTGTCAAGTCCGAAATAA      | CCATAGCGAGGCTGAGGTT       | 100.73%                           |
| CCND2  | TCACCCCTCCCTTATTTTT       | ACCCTCCAACCTTGGCTTCT      | 107.60%                           |

Table S3. Mass spectrometry results for STAT1 IPs

|       | Strain and MOI          | Sample            | Fraction        | Total STAT1 peptides | Unique STAT1 peptides | % Coverage of STAT1 |
|-------|-------------------------|-------------------|-----------------|----------------------|-----------------------|---------------------|
| IP #1 | RH MOI~8                | Uninfected, US    | cytoplasmic     | 26                   | 21                    | 35                  |
|       |                         |                   | nuclear extract | 0                    |                       |                     |
|       |                         |                   | chromatin       | 0                    |                       |                     |
|       |                         | Uninfected + IFNy | cytoplasmic     | 26                   | 22                    | 36                  |
|       |                         |                   | nuclear extract | 3                    | 3                     | 5                   |
|       |                         |                   | chromatin       | 0                    |                       |                     |
|       |                         | Infected, US      | cytoplasmic     | 20                   | 16                    | 25                  |
|       |                         |                   | nuclear extract | 14                   | 13                    | 21                  |
|       |                         |                   | chromatin       | 18                   | 15                    | 22                  |
|       |                         | Infected + IFNy   | cytoplasmic     | 16                   | 14                    | 22                  |
|       |                         |                   | nuclear extract | 21                   | 15                    | 28                  |
|       |                         |                   | chromatin       | 18                   | 17                    | 28                  |
| IP #2 | RH MOI~1.5              | Uninfected, US    | cytoplasmic     | 81                   | 24                    | 43                  |
|       |                         |                   | nuclear extract | 0                    |                       |                     |
|       |                         |                   | chromatin       | 0                    |                       |                     |
|       |                         | Uninfected + IFNy | cytoplasmic     | 71                   | 29                    | 48                  |
|       |                         |                   | nuclear extract | 14                   | 12                    | 21                  |
|       |                         |                   | chromatin       | 6                    | 5                     | 9                   |
|       |                         | Infected, US      | cytoplasmic     | 48                   | 22                    | 39                  |
|       |                         |                   | nuclear extract | 4                    | 4                     | 6                   |
|       |                         |                   | chromatin       | 2                    | 2                     | 4                   |
|       |                         | Infected + IFNy   | cytoplasmic     | 79                   | 28                    | 42                  |
|       |                         |                   | nuclear extract | 26                   | 15                    | 25                  |
|       |                         |                   | chromatin       | 35                   | 25                    | 37                  |
| IP #3 | RH $\Delta rop16$ MOI~5 | Uninfected, US    | cytoplasmic     | 88                   | 35                    | 59                  |
|       |                         |                   | nuclear extract | 0                    |                       |                     |
|       |                         |                   | chromatin       | 0                    |                       |                     |
|       |                         | Uninfected + IFNy | cytoplasmic     | 90                   | 36                    | 59                  |
|       |                         |                   | nuclear extract | 21                   | 16                    | 28                  |
|       |                         |                   | chromatin       | 11                   | 9                     | 15                  |
|       |                         | Infected, US      | cytoplasmic     | 78                   | 31                    | 51                  |
|       |                         |                   | nuclear extract | 5                    | 5                     | 9                   |
|       |                         |                   | chromatin       | 2                    | 2                     | 3                   |
|       |                         | Infected + IFNy   | cytoplasmic     | 83                   | 38                    | 51                  |
|       |                         |                   | nuclear extract | 43                   | 27                    | 47                  |
|       |                         |                   | chromatin       | 43                   | 28                    | 46                  |
